# Supplementary material
Source: PubMed Central journal article supplement (PMC10841342)
Supplement: NIHMS1958949-supplement-Tables_S1-S5.pdf [file NIHMS1958949-supplement-Tables_S1-S5.pdf]

| Parameter                          | Control -           |
|------------------------------------|---------------------|
|                                    | Alcoholic hepatitis |
| <b>PIGR</b>                        | P=0,0054*           |
| <b>IgA</b>                         | P=0,0092*           |
| <b>PIGR-IgA colocalization</b>     | P=0,0186*           |
| <b>PIGR hepatocytes</b>            | P=0,0061*           |
| <b>PIGR biliary diffuse</b>        | P=0,0108*           |
| <b>PIGR biliary apical/luminal</b> | P=0,0265*           |

Table S1. P-values Figure 1 and Figure S1.

| Parameter                             | Females                         | Males                           |
|---------------------------------------|---------------------------------|---------------------------------|
|                                       | Wt - <i>plgR</i> <sup>-/-</sup> | Wt - <i>plgR</i> <sup>-/-</sup> |
| Fecal IgA                             | P<0,0001*                       | P=0,0003*                       |
| Plasma IgA                            | P<0,0001*                       | P<0,0001*                       |
| Liver/body weight                     | P=0,0054*                       | P=0,0362*                       |
| ALT                                   | P=0,0159*                       | P=0,0354*                       |
| Hepatic triglycerides                 | P=0,0308*                       | P=0,0220*                       |
| Oil Red O+                            | P=0,0306*                       | P=0,0149*                       |
| Hepatic <i>Cxcl1</i> (18S)            | P=0,0499*                       | P=0,0262*                       |
| Hepatic <i>Cxcl2</i> (18S)            | P=0,0673                        | P=0,0321*                       |
| Hepatic <i>Ccr2</i> (18S)             | P=0,0114*                       | P=0,0516                        |
| Hepatic <i>Cd11b</i> (18S)            | P=0,0187*                       | P=0,0321*                       |
| Mac1+                                 | P<0,0001*                       | P<0,0001*                       |
|                                       |                                 |                                 |
| Food intake                           | P=0,1615                        | P=0,7326                        |
| Plasma EtOH                           | P=0,8058                        | P=0,5464                        |
| Plasma acetate                        | P=0,9351                        | P=0,4063                        |
| Hepatic <i>Adh1</i> (18S)             | P=0,7216                        | P=0,4000                        |
| Hepatic <i>Cyp2e1</i> (18S)           | P=0,3166                        | P=0,9328                        |
| Hepatic <i>Cxcl1</i> ( <i>Ppib</i> )  | P=0,0480*                       | P=0,0214*                       |
| Hepatic <i>Cxcl2</i> ( <i>Ppib</i> )  | P=0,0366*                       | P=0,0636*                       |
| Hepatic <i>Ccr2</i> ( <i>Ppib</i> )   | P=0,0350*                       | P=0,0070*                       |
| Hepatic <i>Cd11b</i> ( <i>Ppib</i> )  | P=0,0098*                       | P=0,0313*                       |
| Hepatic <i>Adh1</i> ( <i>Ppib</i> )   | P=0,4918                        | P=0,5732                        |
| Hepatic <i>Cyp2e1</i> ( <i>Ppib</i> ) | P=0,2710                        | P=0,4868                        |

Table S2. P-values Figure 2 and Figure S2.

| Parameter                             | Isocaloric                      | Ethanol                         |                                     |
|---------------------------------------|---------------------------------|---------------------------------|-------------------------------------|
|                                       | Wt - <i>plgR</i> <sup>-/-</sup> | Wt - <i>plgR</i> <sup>-/-</sup> |                                     |
| Fecal IgA                             | P=0,0024*                       | P=0,0002*                       |                                     |
| Plasma IgA                            | P=0,0001*                       | P<0,0001*                       |                                     |
| Liver/body weight                     | P=0,0106*                       | P=0,0031*                       |                                     |
| ALT                                   | P=0,2078                        | P=0,0446*                       |                                     |
| Hepatic triglycerides                 | P=0,7461                        | P=0,0313*                       |                                     |
| Oil Red O+                            | P=0,7447                        | P=0,0024*                       |                                     |
| Hepatic <i>Cxcl1</i> (18S)            |                                 | P=0,0063*                       |                                     |
| Hepatic <i>Cxcl2</i> (18S)            |                                 | P=0,0688                        |                                     |
| Hepatic <i>Ccr2</i> (18S)             |                                 | P=0,0471*                       |                                     |
| Hepatic <i>Cd11b</i> (18S)            |                                 | P=0,0324*                       |                                     |
| Hepatic <i>Col1a1</i> (18S)           |                                 | P=0,0187*                       |                                     |
| Hepatic <i>Timp1</i> (18S)            |                                 | P=0,0194*                       |                                     |
| Sirius Red+                           |                                 | P=0,0060*                       |                                     |
| Plasma LPS                            |                                 | P=0,0023*                       |                                     |
| Total hepatic bacteria                |                                 | P=0,0415*                       |                                     |
| Fecal <i>E. coli</i> cultures         |                                 | P=0,0391*                       |                                     |
| Hepatic <i>E. coli</i> (16S)          |                                 | P=0,0425*                       |                                     |
|                                       |                                 |                                 |                                     |
| Food intake                           | P=0,3559                        | P=0,4364                        |                                     |
| Plasma EtOH                           |                                 | P=0,3906                        |                                     |
| Plasma acetate                        |                                 | P=0,2502                        |                                     |
| Hepatic <i>Adh1</i> (18S)             |                                 | P=0,6553                        |                                     |
| Hepatic <i>Cyp2e1</i> (18S)           |                                 | P=0,6876                        |                                     |
| Hepatic <i>Cxcl1</i> ( <i>Ppib</i> )  |                                 | P=0,1203                        |                                     |
| Hepatic <i>Cxcl2</i> ( <i>Ppib</i> )  |                                 | P=0,02296*                      |                                     |
| Hepatic <i>Ccr2</i> ( <i>Ppib</i> )   |                                 | P=0,0494*                       |                                     |
| Hepatic <i>Cd11b</i> ( <i>Ppib</i> )  |                                 | P=0,0357*                       |                                     |
| Hepatic <i>Col1a1</i> ( <i>Ppib</i> ) |                                 | P=0,0376*                       |                                     |
| Hepatic <i>Timp1</i> ( <i>Ppib</i> )  |                                 | P=0,0293*                       |                                     |
| Hepatic <i>Adh1</i> ( <i>Ppib</i> )   |                                 | P=0,2008                        |                                     |
| Hepatic <i>Cyp2e1</i> ( <i>Ppib</i> ) |                                 | P=0,3392                        |                                     |
|                                       | Pre-sort - IgA <sup>-</sup>     | Pre-sort - IgA <sup>+</sup>     | IgA <sup>-</sup> - IgA <sup>+</sup> |
| IgA <sup>+</sup> bacteria             | P=0,0116*                       | P<0,0001*                       | P<0,0001*                           |
| <i>E. coli</i> (16S)                  |                                 |                                 | P=0,0049*                           |

Table S3. P-values Figure 3 and Figure S3.

| Parameter                             | <i>pIgR</i> <sup>-/-</sup> |
|---------------------------------------|----------------------------|
|                                       | Control - ABX              |
| Fecal IgA                             | P=0,2835                   |
| Plasma IgA                            | P=0,1580                   |
| Liver/body weight                     | P=0,7972                   |
| ALT                                   | P=0,0424*                  |
| Hepatic triglycerides                 | P=0,2072                   |
| Oil Red O+                            | P=0,2427                   |
| Hepatic <i>Cxcl1</i> (18S)            | P=0,0484*                  |
| Hepatic <i>Ccr2</i> (18S)             | P=0,0176*                  |
| Hepatic <i>Cd11b</i> (18S)            | P=0,0340*                  |
| Hepatic <i>Ccl2</i> (18S)             | P=0,0369*                  |
| Mac1+                                 | P=0,0024*                  |
|                                       |                            |
| Food intake                           | P=0,0691                   |
| Plasma EtOH                           | P=0,2259                   |
| Plasma acetate                        | P=0,5620                   |
| Hepatic <i>Adh1</i> (18S)             | P=0,1698                   |
| Hepatic <i>Cyp2e1</i> (18S)           | P=0,3555                   |
| Hepatic <i>Cxcl1</i> ( <i>Ppib</i> )  | P=0,0358*                  |
| Hepatic <i>Ccr2</i> ( <i>Ppib</i> )   | P=0,0253*                  |
| Hepatic <i>Cd11b</i> ( <i>Ppib</i> )  | P=0,1988                   |
| Hepatic <i>Adh1</i> ( <i>Ppib</i> )   | P=0,9074                   |
| Hepatic <i>Cyp2e1</i> ( <i>Ppib</i> ) | P=0,9496                   |

Table S4. P-values Figure 4 and Figure S4.

| Parameter                              | Wt GFP -                       | <i>plgR</i> <sup>-/-</sup> GFP -       | Wt GFP -                               |
|----------------------------------------|--------------------------------|----------------------------------------|----------------------------------------|
|                                        | <i>plgR</i> <sup>-/-</sup> GFP | <i>plgR</i> <sup>-/-</sup> <i>plgR</i> | <i>plgR</i> <sup>-/-</sup> <i>plgR</i> |
| Fecal IgA                              | P<0,0001*                      | P=0,0003*                              | P<0,0001*                              |
| Plasma IgA                             | P<0,0001*                      | P=0,6049                               | P<0,0001*                              |
| Liver/body weight                      | P=0,8185                       | P=0,5390                               | P>0,9999                               |
| ALT                                    | P=0,0056*                      | P=0,0010*                              | P>0,9999                               |
| Hepatic triglycerides                  | P=0,0427*                      | P=0,0057*                              | P=0,8963                               |
| Oil Red O+                             | P=0,0528                       | P=0,0042*                              | P=0,6845                               |
| Hepatic <i>Cxcl1</i> (18S)             | P=0,0455*                      | P=0,3739                               | P=0,8883                               |
| Hepatic <i>Cxcl2</i> (18S)             | P>0,9999                       | P=0,1463                               | P=0,5572                               |
| Hepatic <i>Ccr2</i> (18S)              | P>0,9999                       | P=0,0473*                              | P=0,1617                               |
| Plasma LPS                             | P=0,0088*                      | P=0,0442*                              | P=0,8363                               |
|                                        |                                |                                        |                                        |
| Hepatic <i>plgR</i> (18S)              | P=0,0012*                      | P=0,0011*                              | P=0,0046*                              |
| Plasma EtOH                            | P>0,9999                       | P=0,5050                               | P>0,9999                               |
| Plasma acetate                         | P>0,9999                       | P>0,9999                               | P=0,7542                               |
| Hepatic <i>Adh1</i> (18S)              | P=0,9818                       | P=0,4683                               | P>0,9999                               |
| Hepatic <i>Cyp2e1</i> (18S)            | P>0,9999                       | P=0,9729                               | P>0,9999                               |
| Hepatic <i>Cxcl1</i> ( <i>Gapdh</i> )  | P=0,0054*                      | P=0,0085*                              | P>0,9999                               |
| Hepatic <i>Cxcl2</i> ( <i>Gapdh</i> )  | P=0,4115                       | P=0,0161*                              | P=0,4785                               |
| Hepatic <i>Ccr2</i> ( <i>Gapdh</i> )   | P=0,0659                       | P=0,0463*                              | P>0,9999                               |
| Hepatic <i>Adh1</i> ( <i>Gapdh</i> )   | P>0,9999                       | P>0,9999                               | P>0,9999                               |
| Hepatic <i>Cyp2e1</i> ( <i>Gapdh</i> ) | P>0,9999                       | P>0,9999                               | P>0,9999                               |

Table S5. P-values Figure 5 and Figure S5.
