# Supplementary material
Source: PubMed Central journal article supplement (PMC10841342)

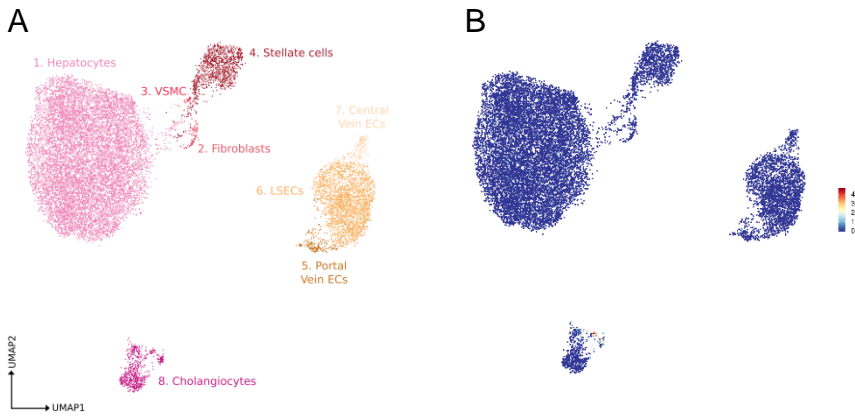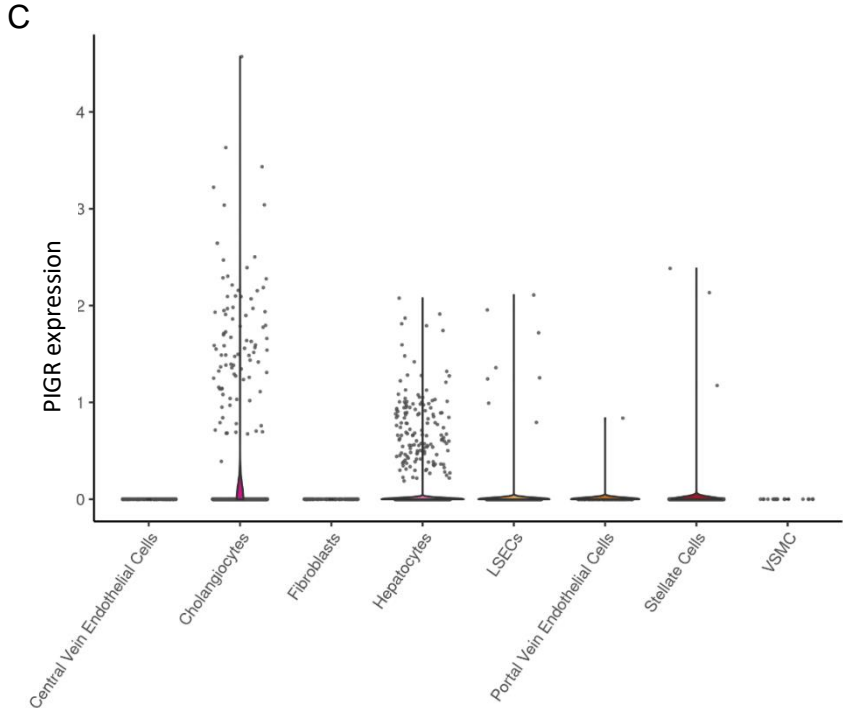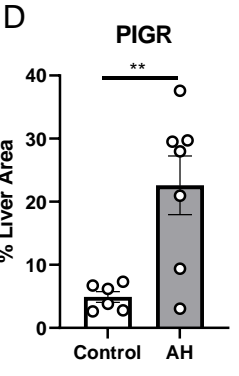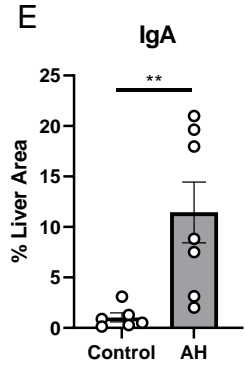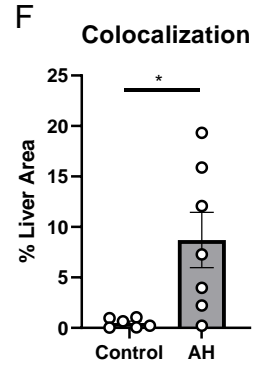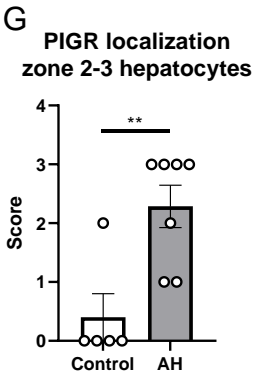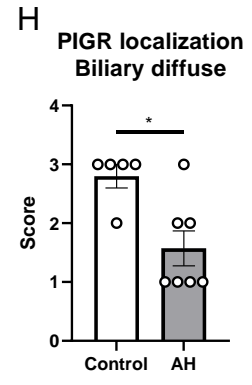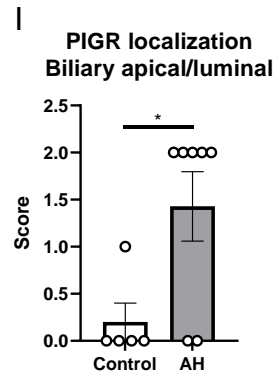

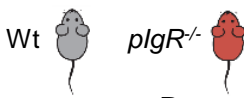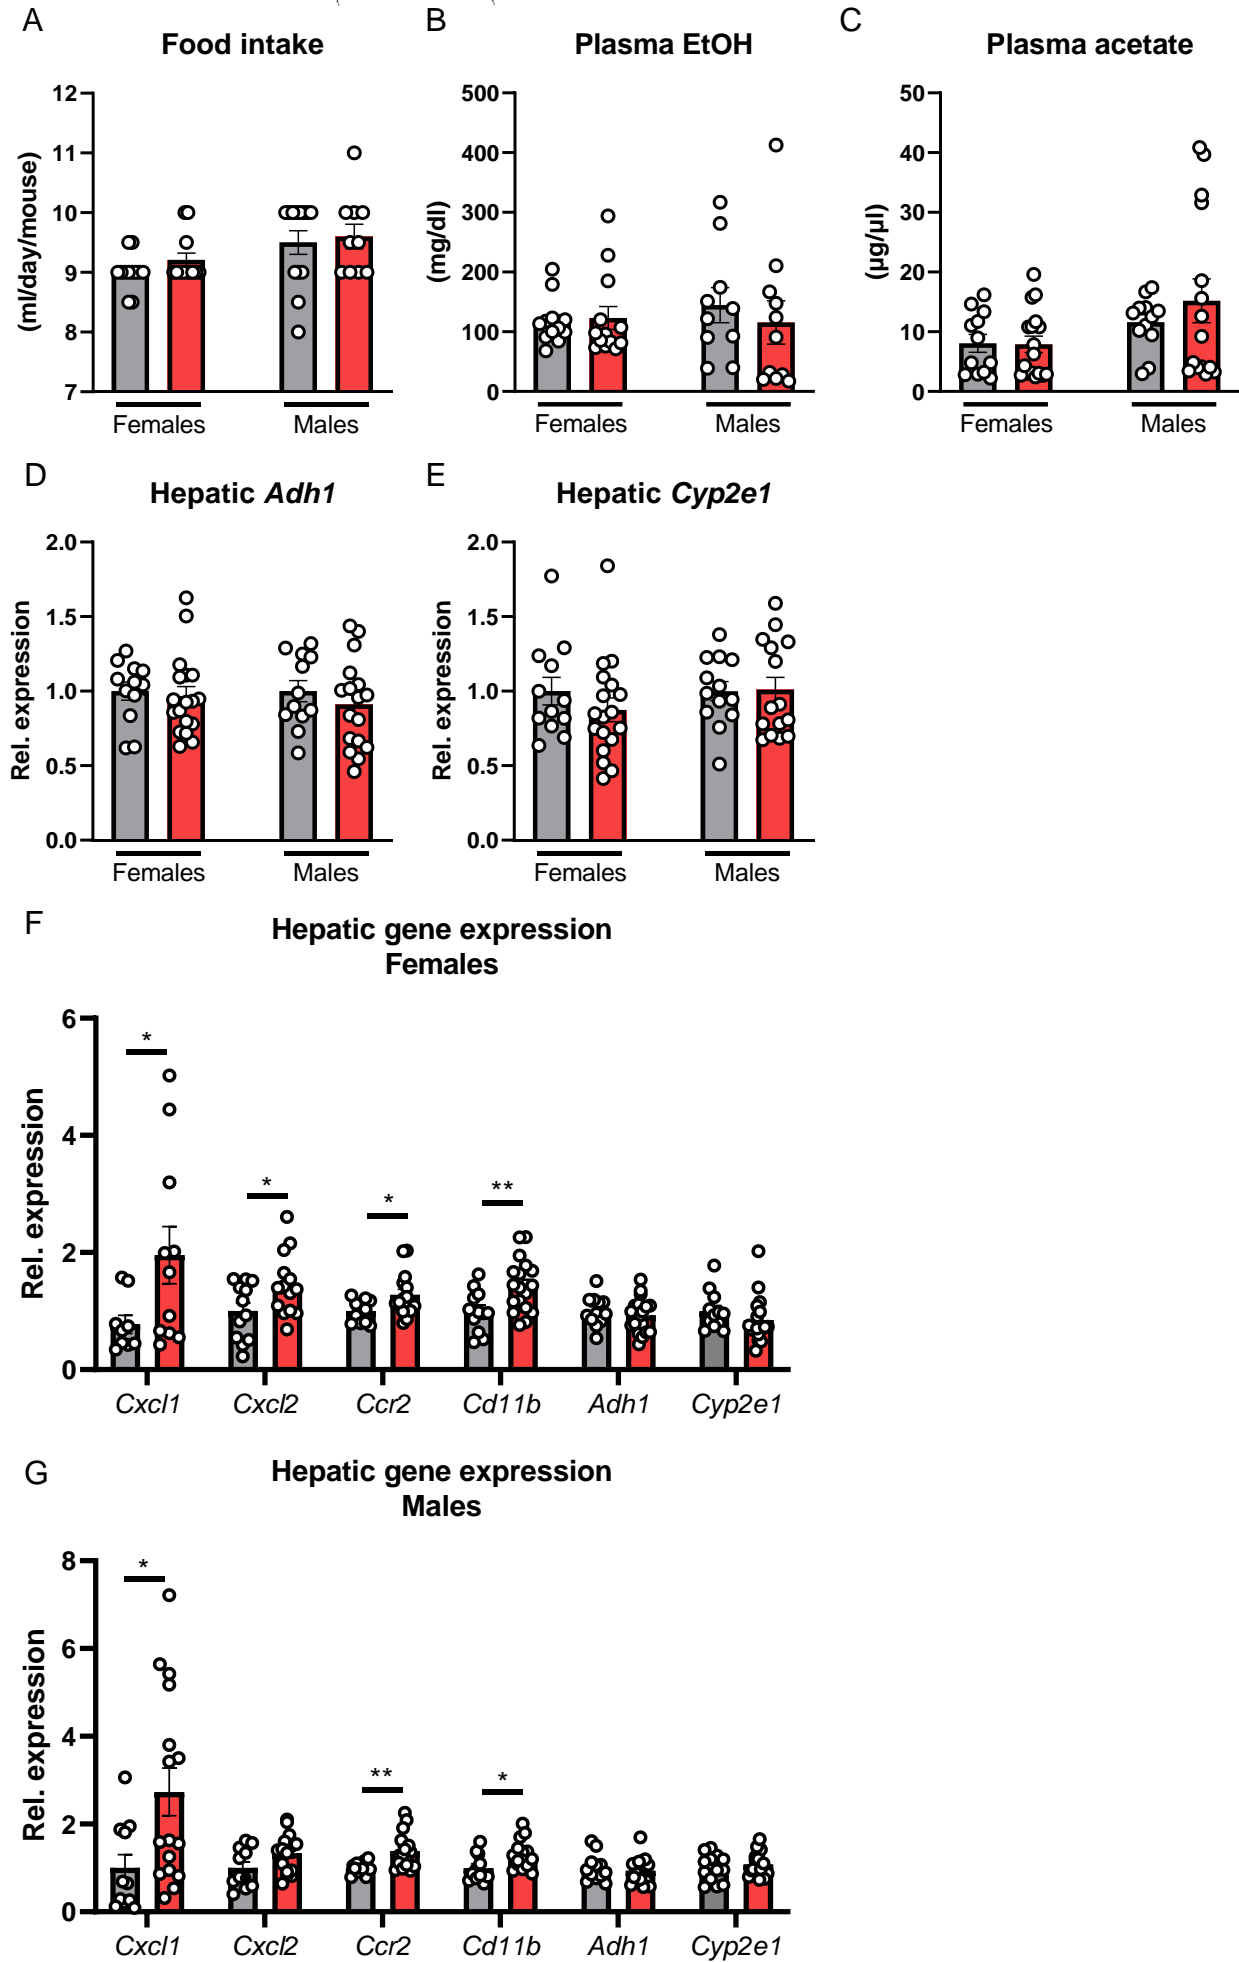

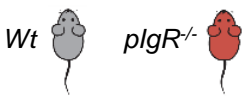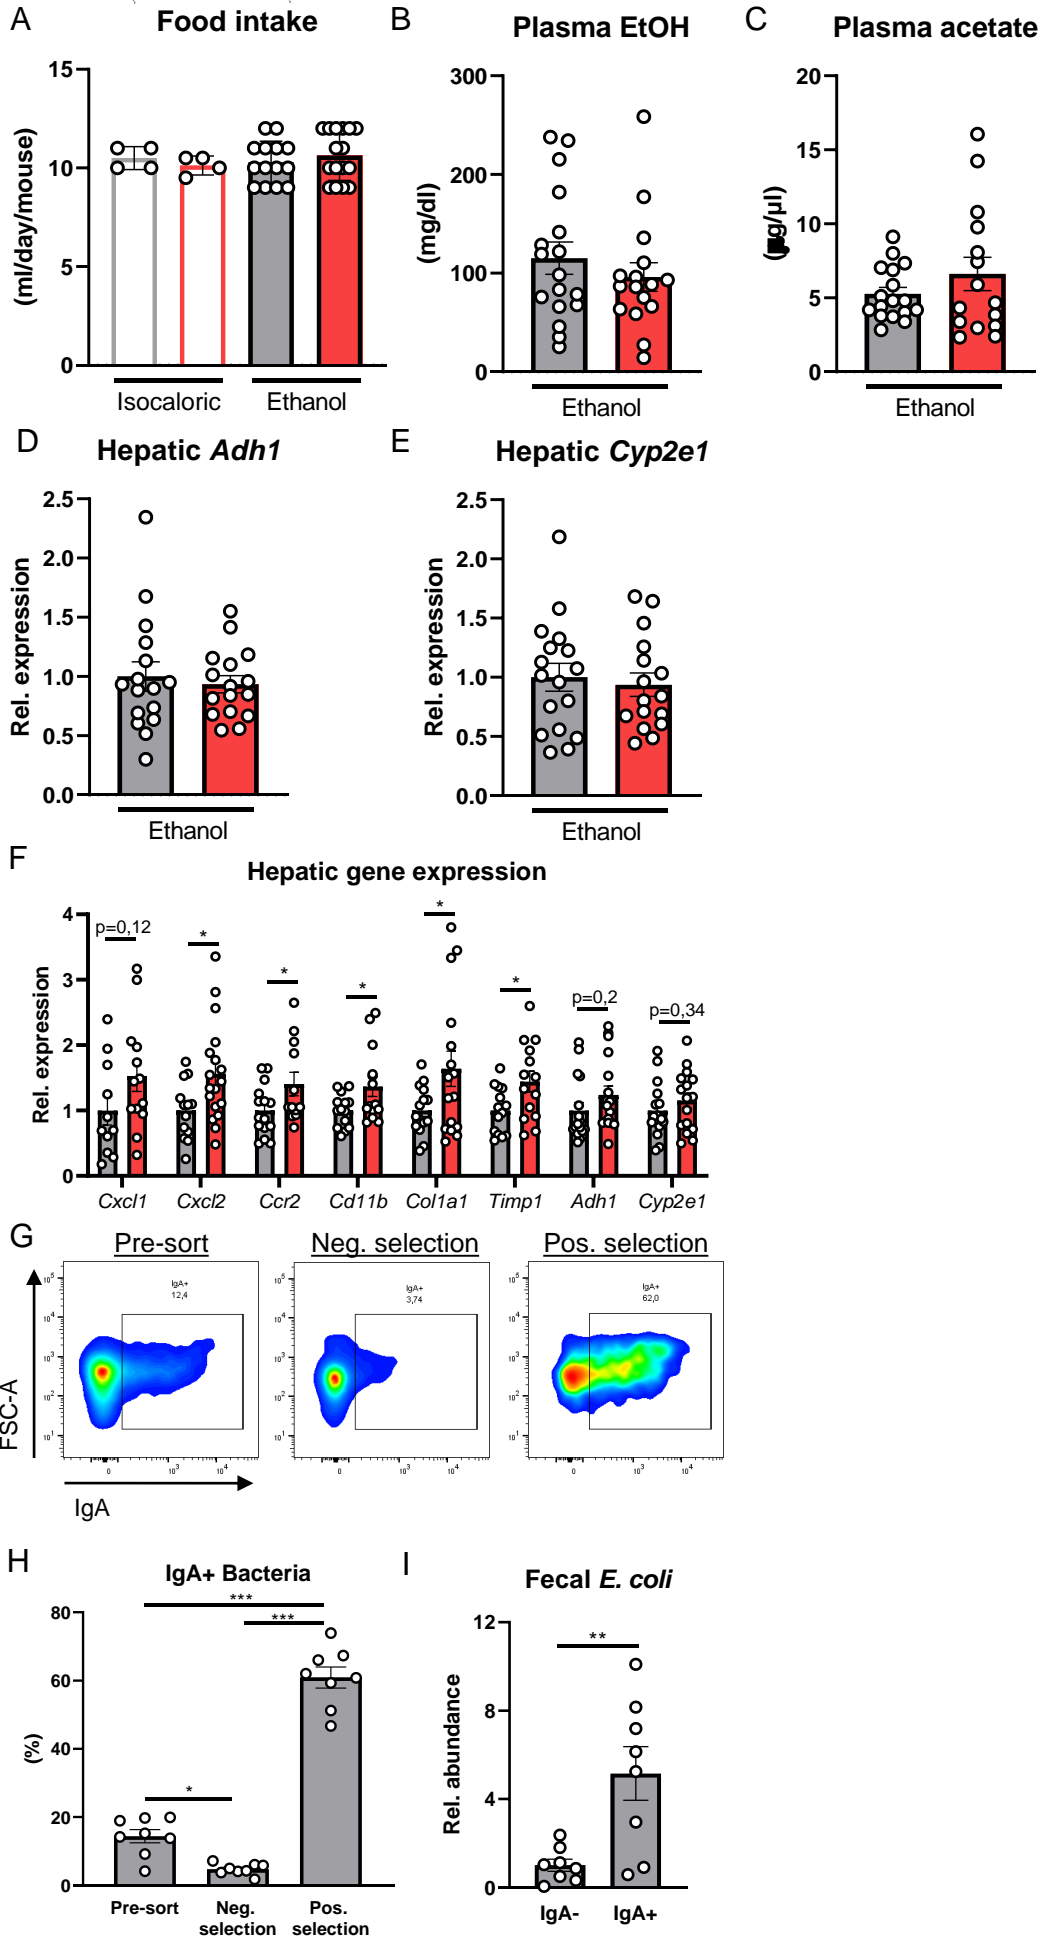

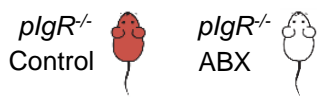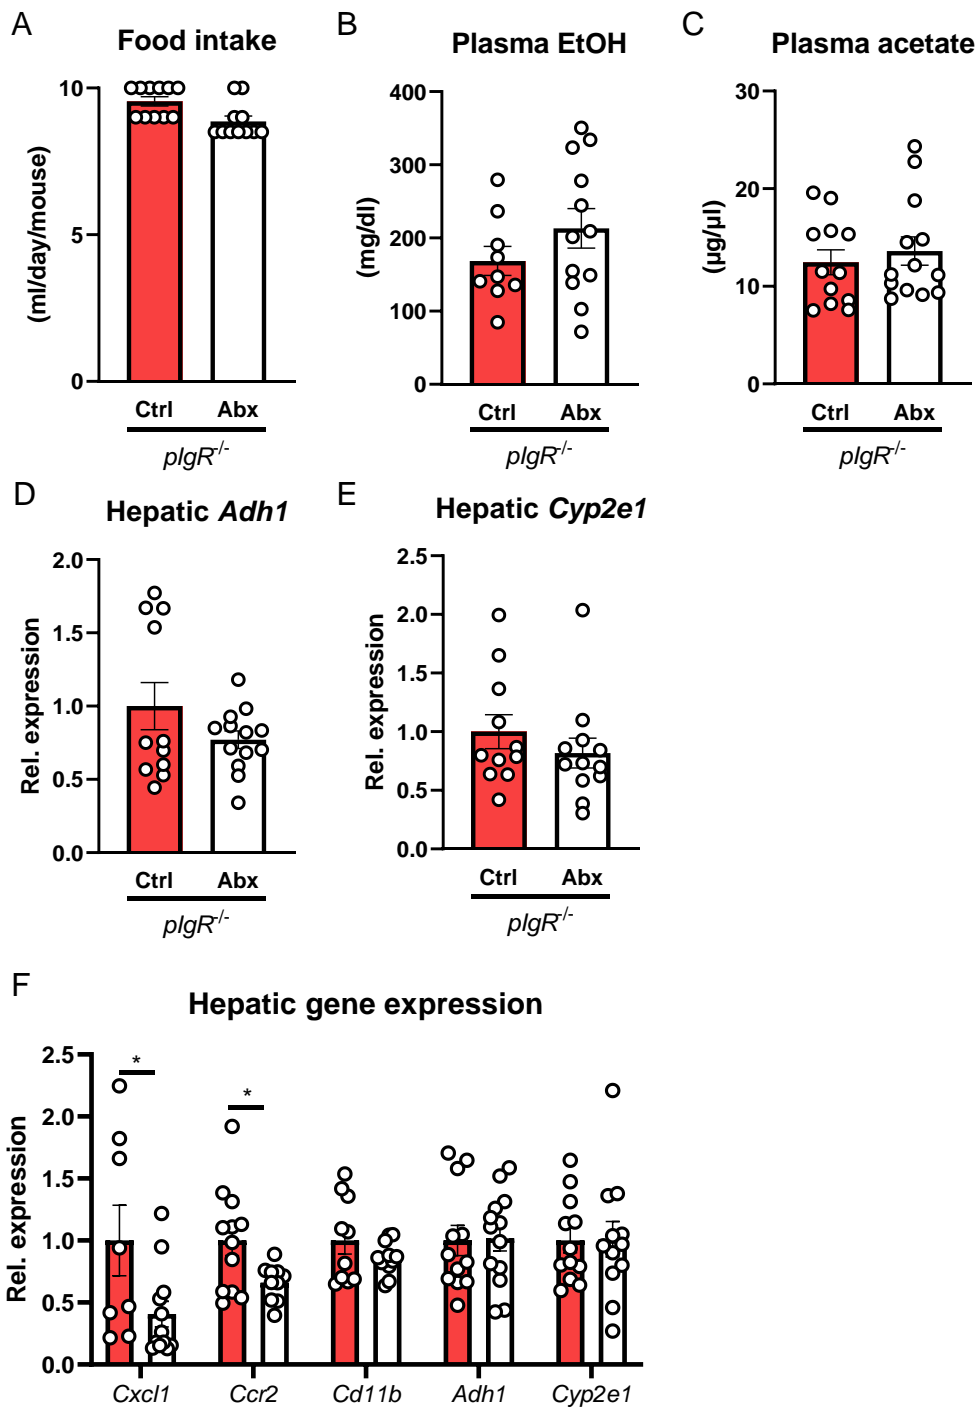

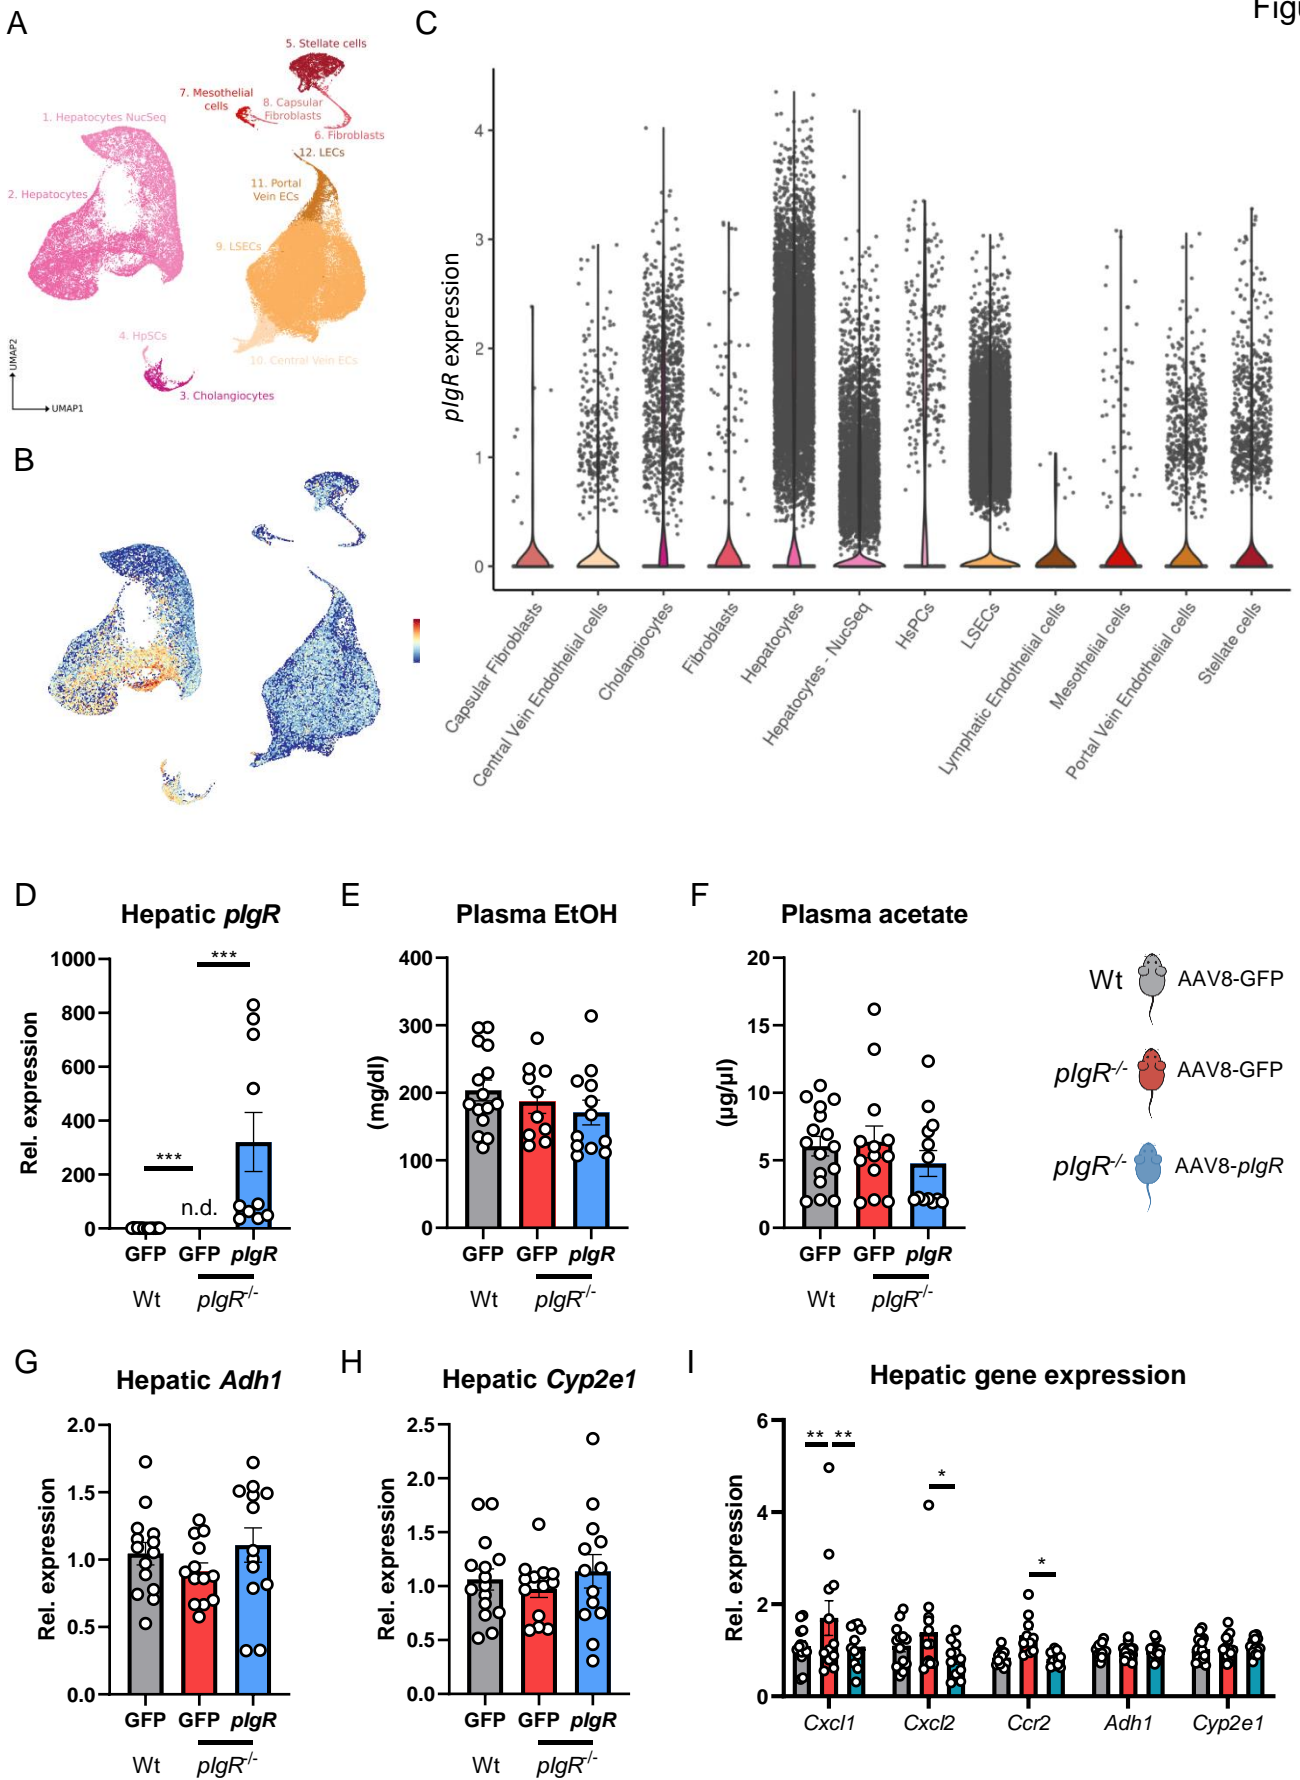

Supplement: NIHMS1958949-supplement-Supplementary_Material.pdf [file NIHMS1958949-supplement-Supplementary_Material.pdf]
